# Supplementary material for: Cross-linked structure of self-aligned p-type SnS nanoplates for highly sensitive NO2 detection at room temperature
Source: Royal Society of Chemistry journal article supplement (doi:10.1039/d1ta11014d), 2022-01-01
Supplement: d1ta11014d1.pdf [file d1ta11014d1.pdf]

## Supplementary Information for

### **Cross-linking Structure of Self-aligned P-Type SnS Nanoplates for Highly Sensitive NO<sub>2</sub> Detection at Room Temperature**

*Young Geun Song,<sup>a,#</sup> In-Hwan Baek,<sup>a,b,#</sup> Jae-Gyun Yim,<sup>a,c</sup> Taeyong Eom,<sup>d</sup> Taek-Mo Chung,<sup>d</sup> Chul-Ho Lee,<sup>c</sup> Cheol Seong Hwang,<sup>b</sup> Chong-Yun Kang,<sup>a,c,\*</sup> and Seong Keun Kim<sup>a,c,\*</sup>*

<sup>a</sup>Electronic Materials Research Center, Korea Institute of Science and Technology, Seoul 02791, South Korea

<sup>b</sup>Department of Materials Science and Engineering and Inter-University Semiconductor Research Center, Seoul National University, Seoul 08826, South Korea

<sup>c</sup>KU-KIST Graduate School of Converging Science and Technology, Korea University, Seoul 02841, South Korea

<sup>d</sup>Division of Advanced Materials, Korea Research Institute of Chemical Technology, Daejeon 34114, South Korea

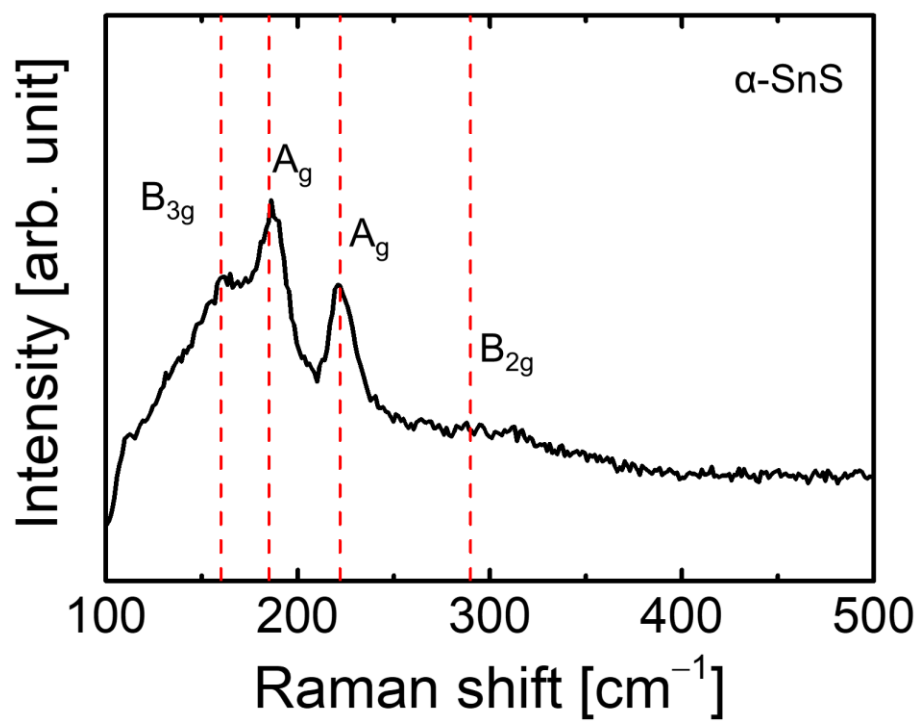

**Figure S1.** Raman spectrum of SnS nanoplates grown on  $\text{SiO}_2$  nanorods.

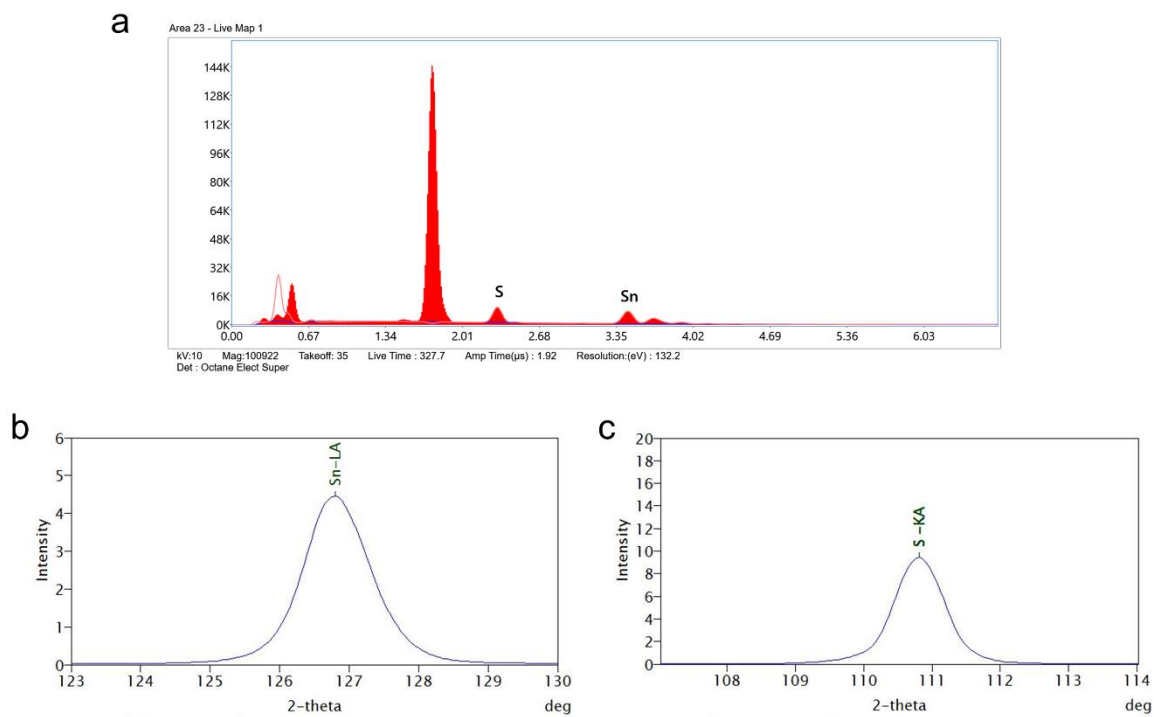

**Figure S2.** (a) Energy-dispersive spectra of SnS nanoplates formed on SiO<sub>2</sub> nanorods obtained from SEM analysis. Variation in the peak intensity of (b) Sn and (c) S elements obtained from wavelength-dispersive x-ray fluorescence.

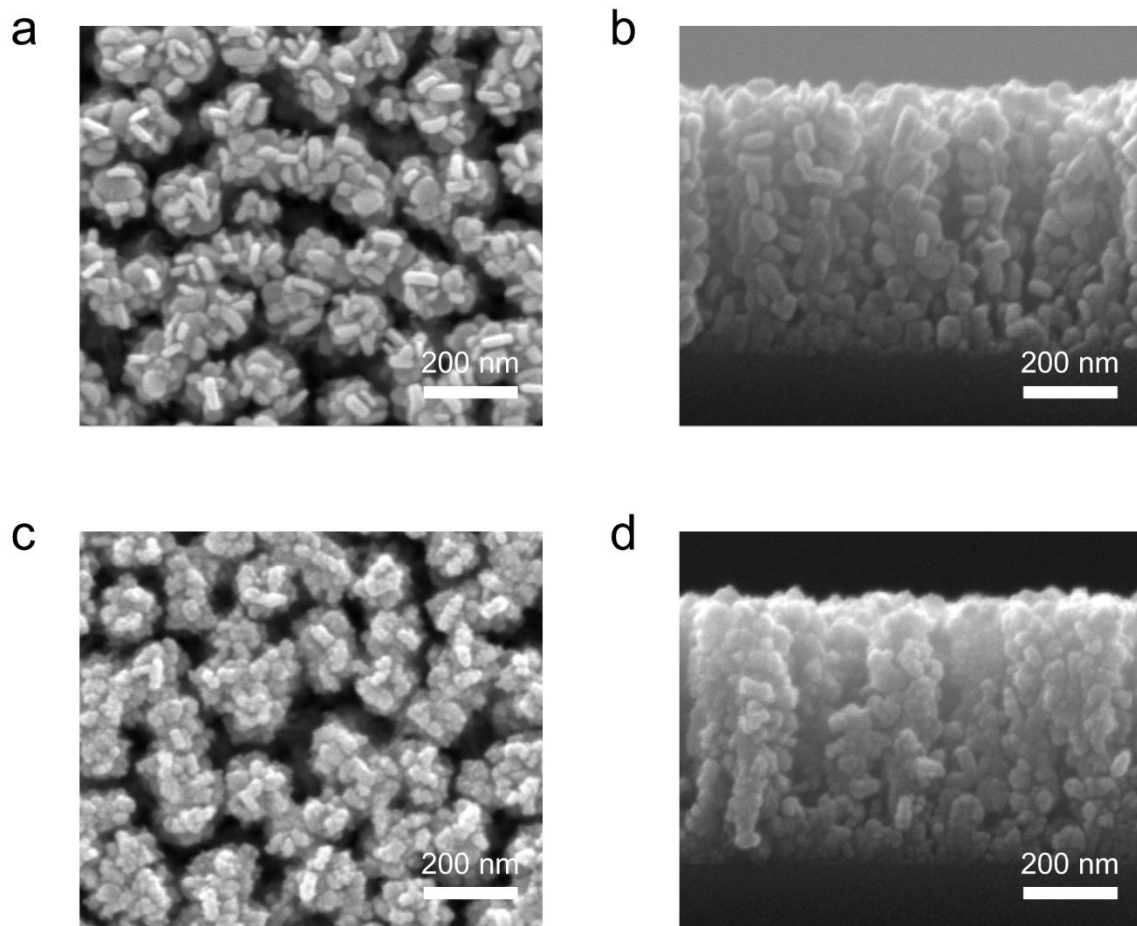

**Figure S3.** (a) Plan-view and (b) cross-sectional SEM images of SnS nanoplates on SiO<sub>2</sub> nanorods. (c) Plan-view and (d) cross-sectional SEM images of the structure after solvent cleaning using acetone, ethanol, and deionized water.

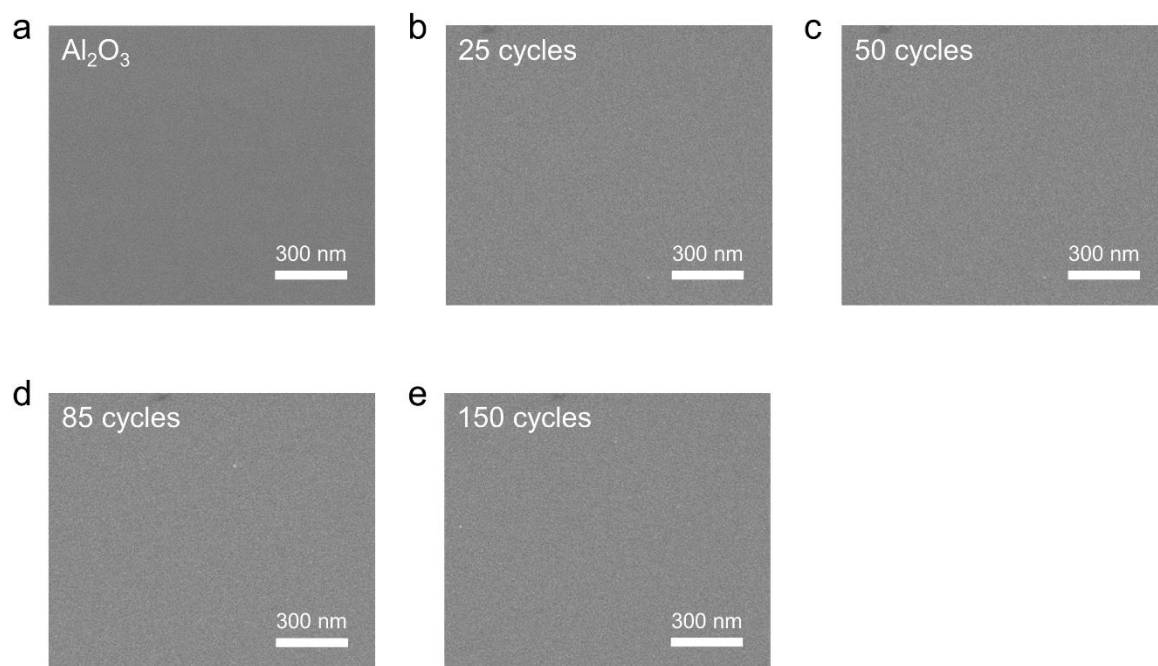

**Figure S4.** Plan-view SEM images of ALD-grown SnS on  $\text{Al}_2\text{O}_3$  for (a) 0, (b) 25, (c) 50, (d) 85, and (e) 150 cycles.

## Note S1

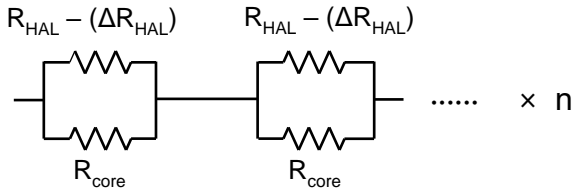

The resistance of the single SnS grain in the absence and presence of  $\text{NO}_2$  can be expressed as  $\frac{R_{core} \times R_{HAL}}{R_{core} + R_{HAL}}$  and  $\frac{R_{core} \times (R_{HAL} - \Delta R_{HAL})}{R_{core} + (R_{HAL} - \Delta R_{HAL})}$ , respectively, because  $R_{HAL}$  and  $R_{core}$  are connected in parallel. The  $R_{core}$  value is assumed to be a constant since the change in the  $R_{core}$  value under exposure to  $\text{NO}_2$  is negligible. The SnS sensor was considered in the form of  $n$  grains connected in series.  $R_a$  and  $R_g$  of the SnS sensor is regarded as  $n$  times the resistance of each SnS grain.

Considering the resistance values, the response of the SnS sensor to  $\text{NO}_2$  is developed as follows;

$$\begin{aligned}
 \text{Response} &= \frac{R_a}{R_g} - 1 = \frac{\left( \frac{R_{core} \times R_{HAL}}{R_{core} + R_{HAL}} \right) \times n}{\left( \frac{R_{core} \times (R_{HAL} - \Delta R_{HAL})}{R_{core} + (R_{HAL} - \Delta R_{HAL})} \right) \times n} - 1 \\
 &= \frac{\cancel{R_{core}} \times R_{HAL} (R_{core} + R_{HAL} - \Delta R_{HAL})}{\cancel{R_{core}} (R_{HAL} - \Delta R_{HAL}) (R_{core} + R_{HAL})} - 1 \\
 &= \frac{R_{core} \Delta R_{HAL}}{(R_{HAL} - \Delta R_{HAL}) (R_{core} + R_{HAL})} \\
 &= \frac{1}{\left( \frac{R_{HAL}}{\Delta R_{HAL}} - 1 \right) \left( 1 + \frac{R_{HAL}}{R_{core}} \right)}
 \end{aligned}$$

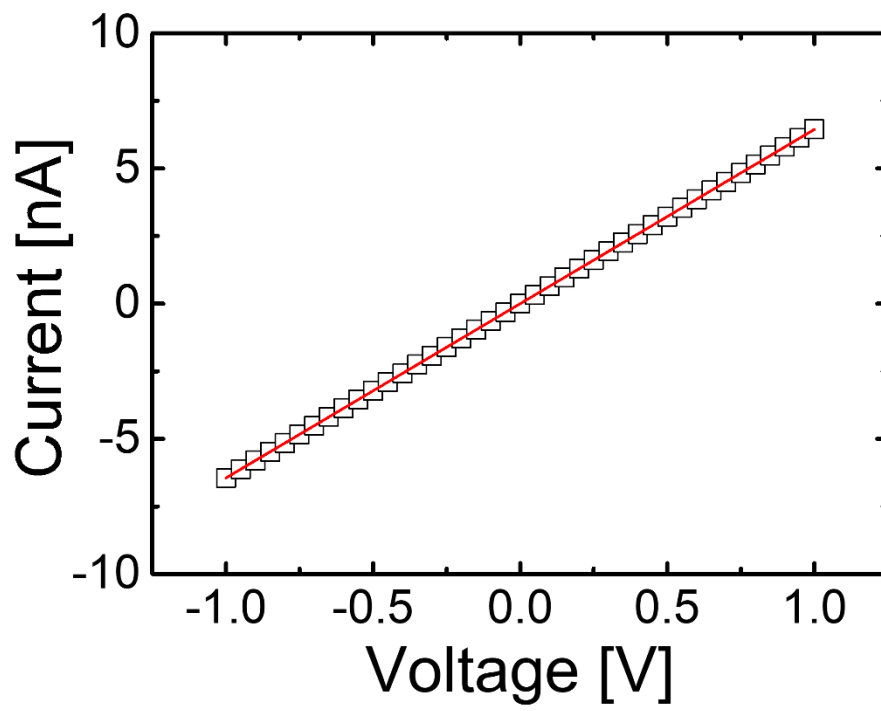

**Figure S5.** I-V curve of SnS nanoplates (75 ALD cycles) grown on SiO<sub>2</sub> nanorods.

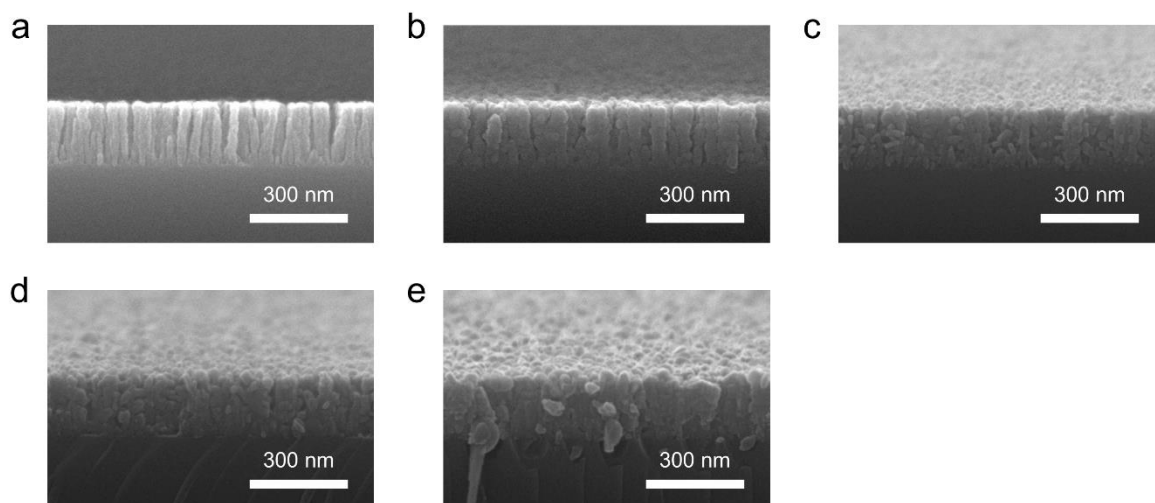

**Figure S6.** Cross-sectional SEM images of SnS grown on SiO<sub>2</sub> for (a) 0, (b) 25, (c) 50, (d) 85, and (e) 150 cycles.

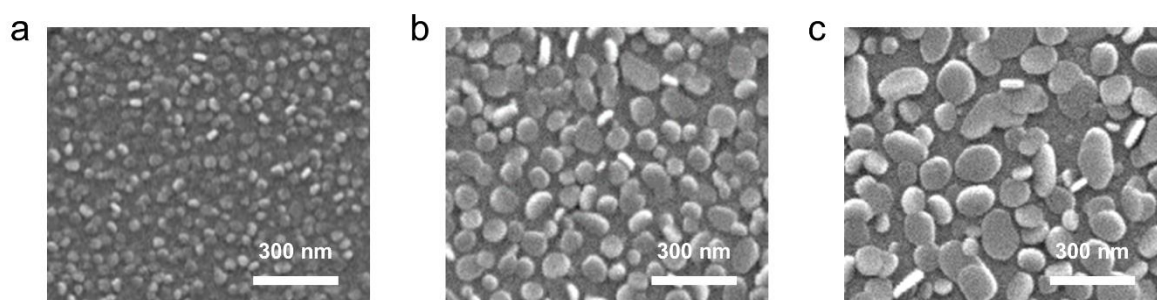

**Figure S7.** Plan-view SEM images of SnS grown on planar SiO<sub>2</sub> for (a) 25, (c) 85, and (e) 150 cycles.



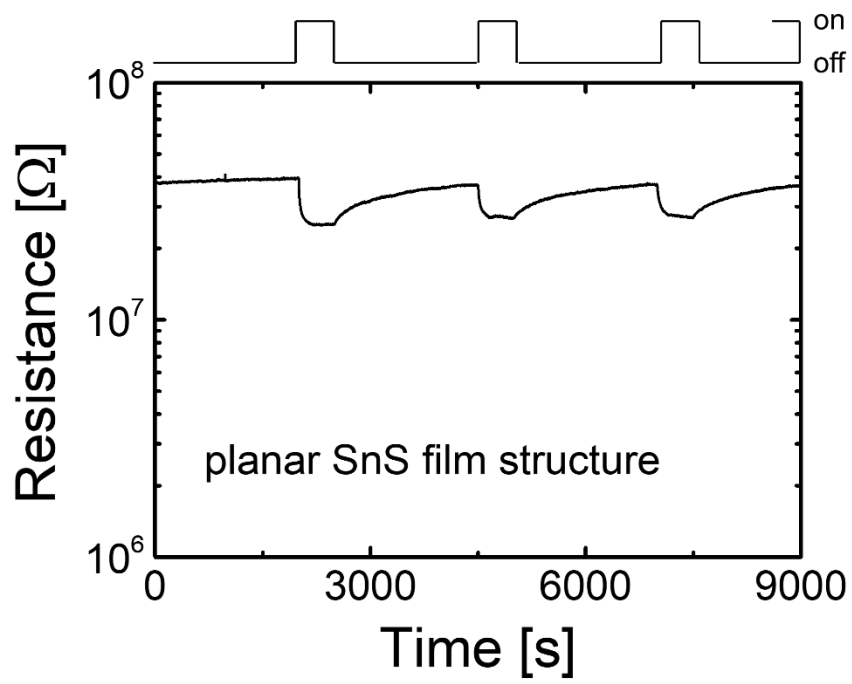

**Figure S8.** Variation in the resistance of the SnS planar film structured sensor grown for 900 cycles to 5 ppm NO<sub>2</sub>.

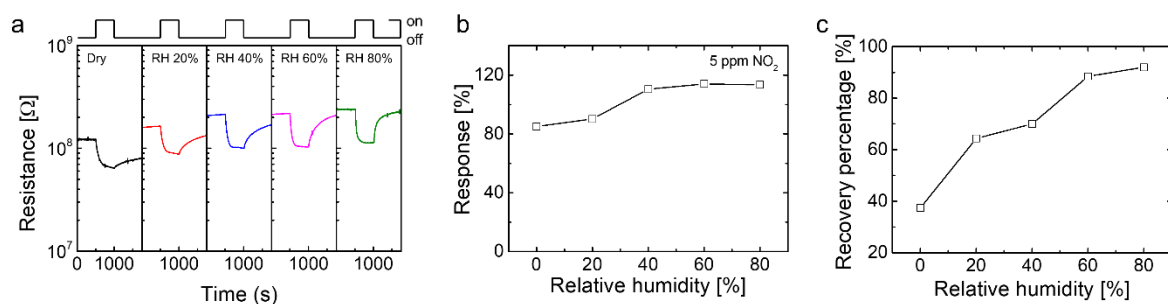

**Figure S9.** Variations in (a) the resistance and (b) the response of the SnS nanoplates on SiO<sub>2</sub> nanorods to 5 ppm NO<sub>2</sub> in the RH range from 0 to 80%. (c) Variation in the recovery percentage of the resistance after 500 s from the start of recovery.

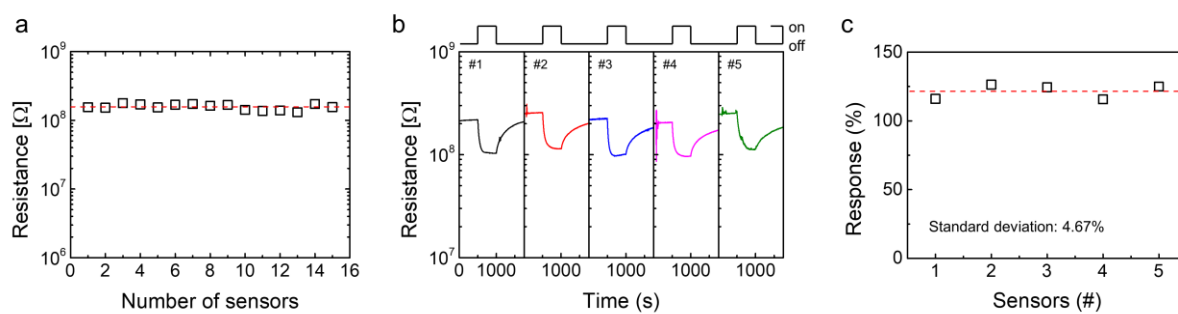

**Figure S10.** (a) Variation in the base resistance of 15 different SnS sensors grown on SiO<sub>2</sub> nanorods for 75 ALD cycles. (b) Variations in the resistance and (c) the response of five different SnS sensors under ambient condition of 60% RH at room temperature upon exposure to 5 ppm NO<sub>2</sub>.

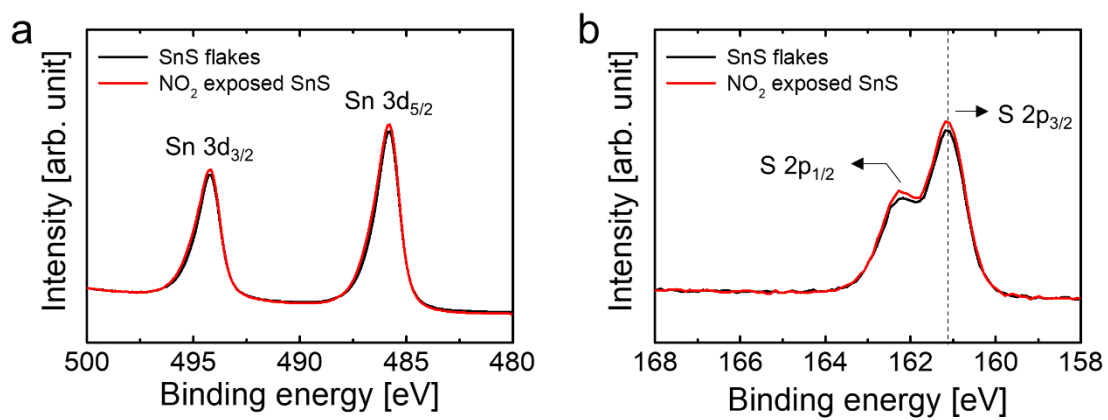

**Figure S11.** XPS spectra of (a) Sn 3d and (b) S 2p core levels in SnS nanoplates grown on SiO<sub>2</sub> nanorods before and after exposure to 100 ppm NO<sub>2</sub> for 5 min.

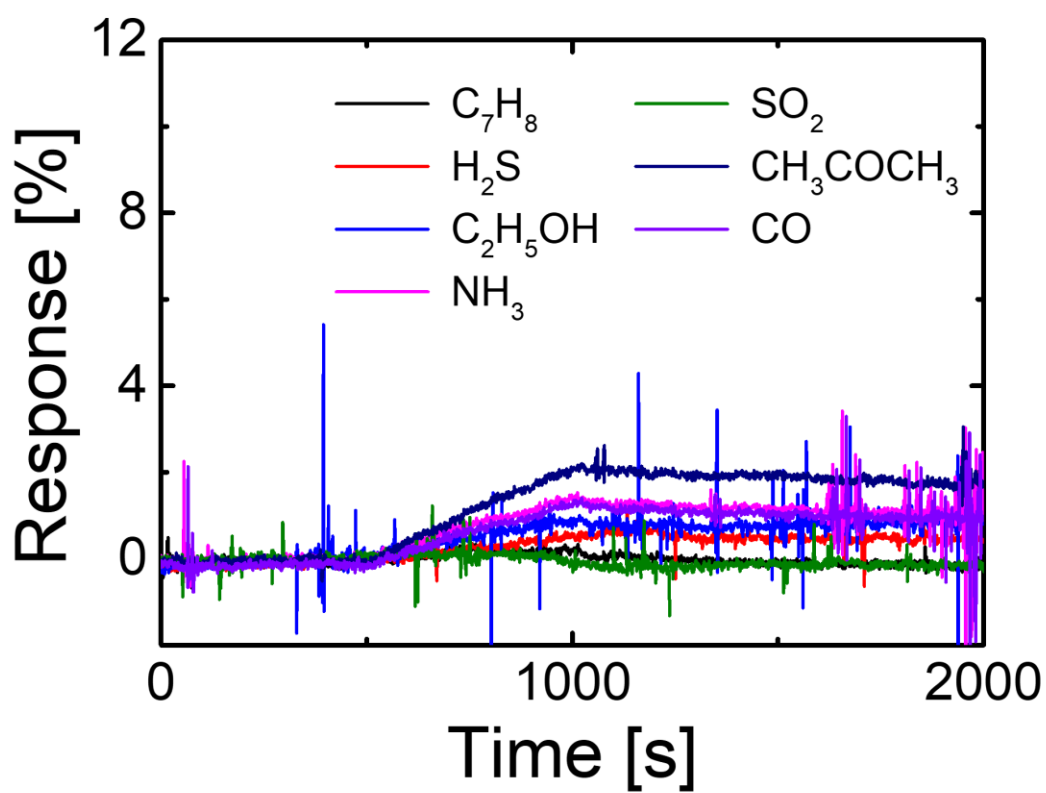

**Figure S12.** Variation in the response of the SnS sensor upon exposure to various gases (NO<sub>2</sub>, C<sub>7</sub>H<sub>8</sub>, H<sub>2</sub>S, C<sub>2</sub>H<sub>5</sub>OH, NH<sub>3</sub>, SO<sub>2</sub>, CH<sub>3</sub>COOCH<sub>3</sub>, and CO) with a concentration of 5 ppm.
